# Supplementary material for: Pyrimidine-based fluorescent COX-2 inhibitors: synthesis and biological evaluation
Source: Royal Society of Chemistry journal article supplement (doi:10.1039/c6ob00493h), 2016-01-01

# Pyrimidine-based fluorescent COX-2 inhibitors: Synthesis and biological evaluation

Ole Tietz<sup>a,1</sup> Jatinder Kaur<sup>a,b,1</sup> Atul Bhardwaj<sup>a,b</sup>; Frank R. Wuest<sup>\*a,b</sup>

<sup>a</sup>Department of Oncology, Cross Cancer Institute, University of Alberta, 11560 University Avenue, T6G 1Z2, Edmonton, AB, Canada.

<sup>b</sup>Department of Pharmacy and Pharmaceutical Sciences, Medical Sciences Building, University of Alberta, T6G 2H1, Edmonton, AB, Canada.

## Supporting Information

1. <sup>1</sup>H-NMR spectra of compound **4**, **5**, **6**, **7**, **8** and **10**
2. <sup>13</sup>C-NMR spectra of compound **5**, **6**, **7**, **8** and **10**

# $^1\text{H-NMR}$ spectra of compound 4

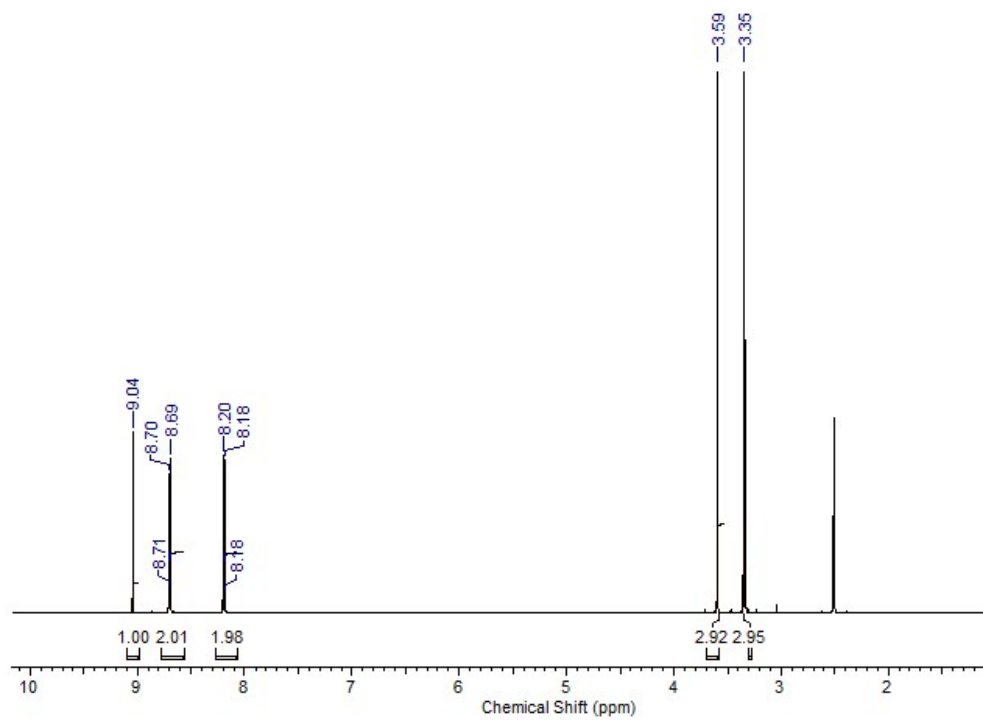

# <sup>1</sup>H-NMR spectra of compound 5

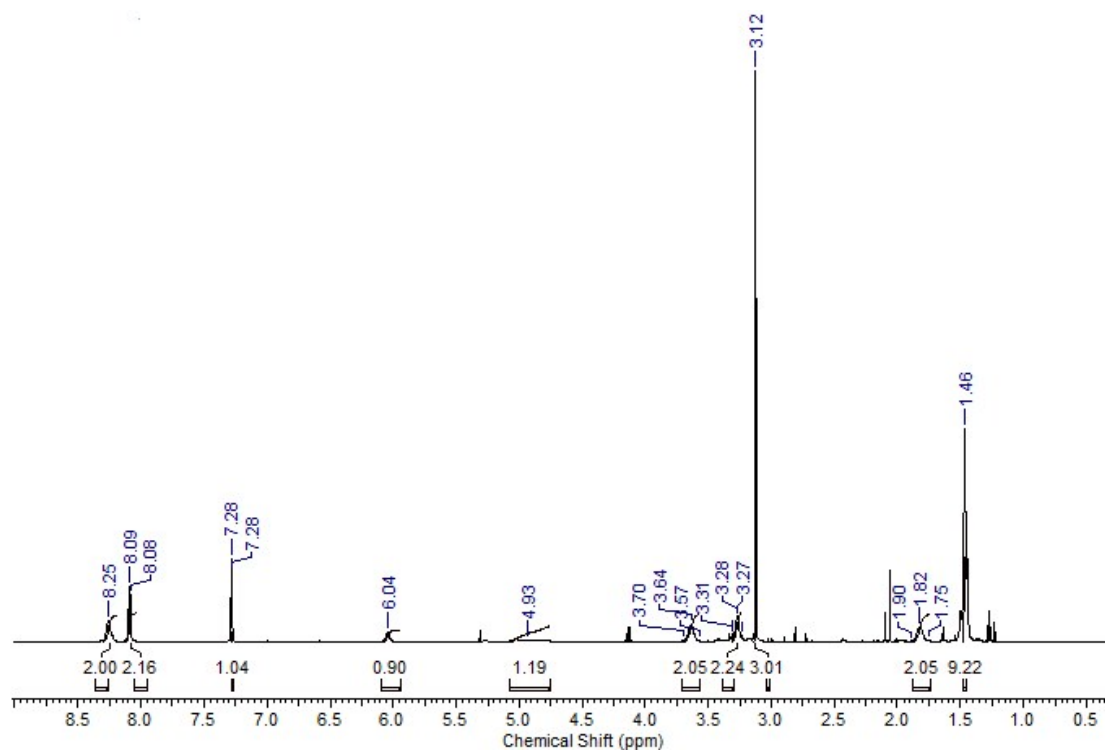

# <sup>1</sup>H-NMR spectra of compound 6

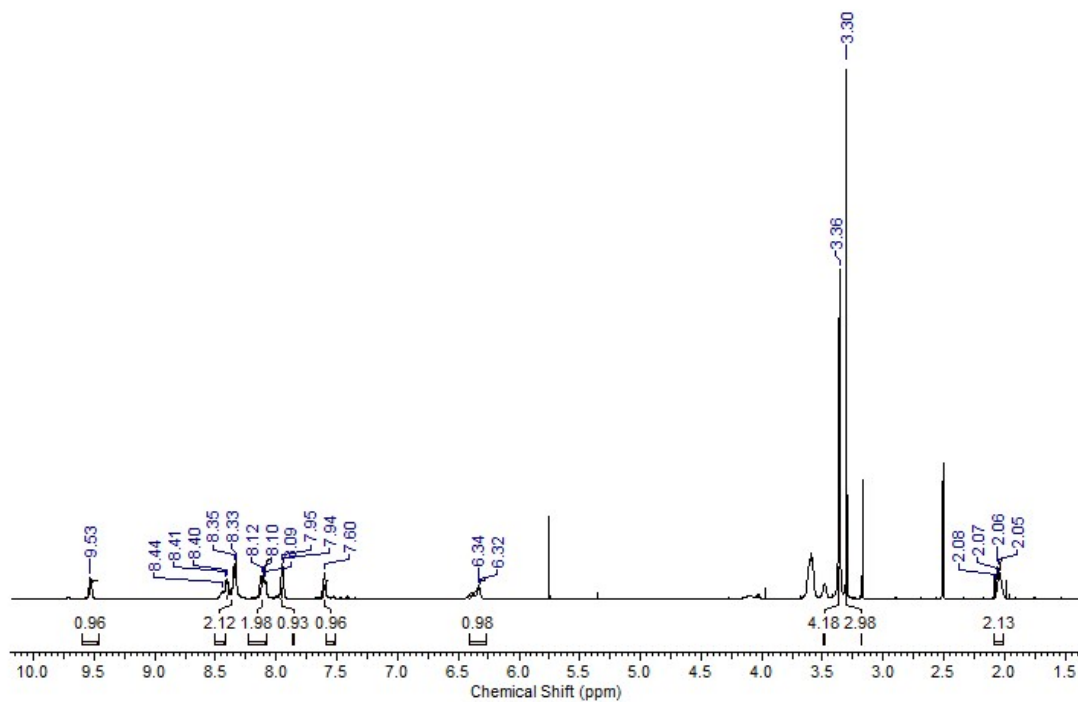

<sup>1</sup>H-NMR spectra of compound 7

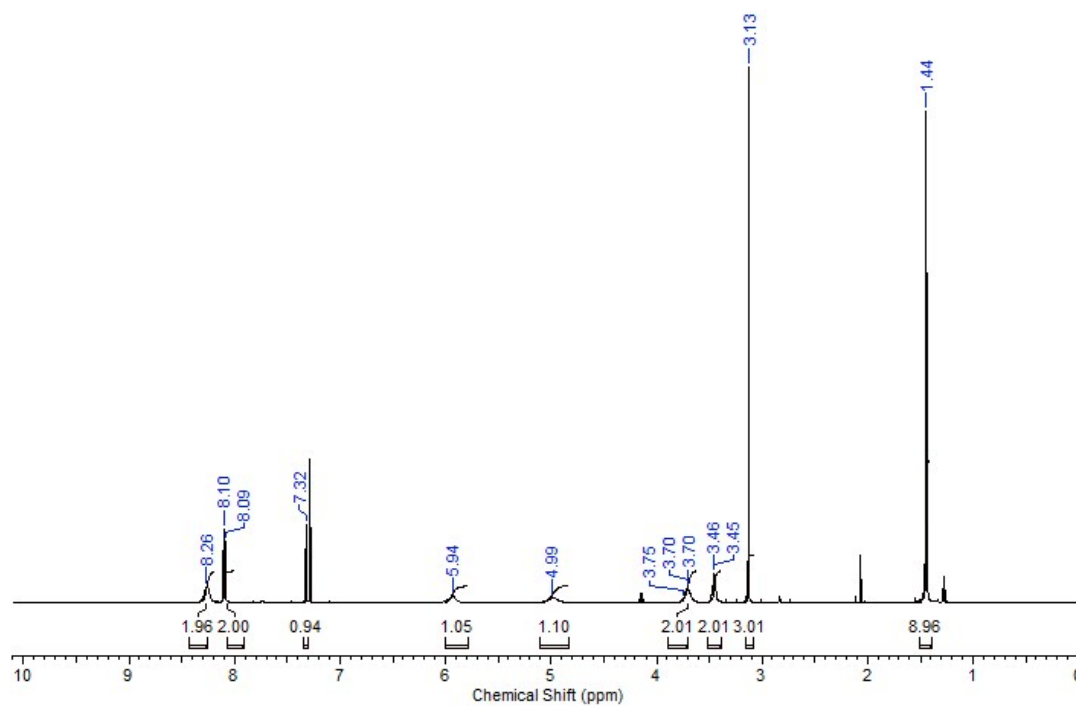

# <sup>1</sup>H-NMR spectra of compound **8**

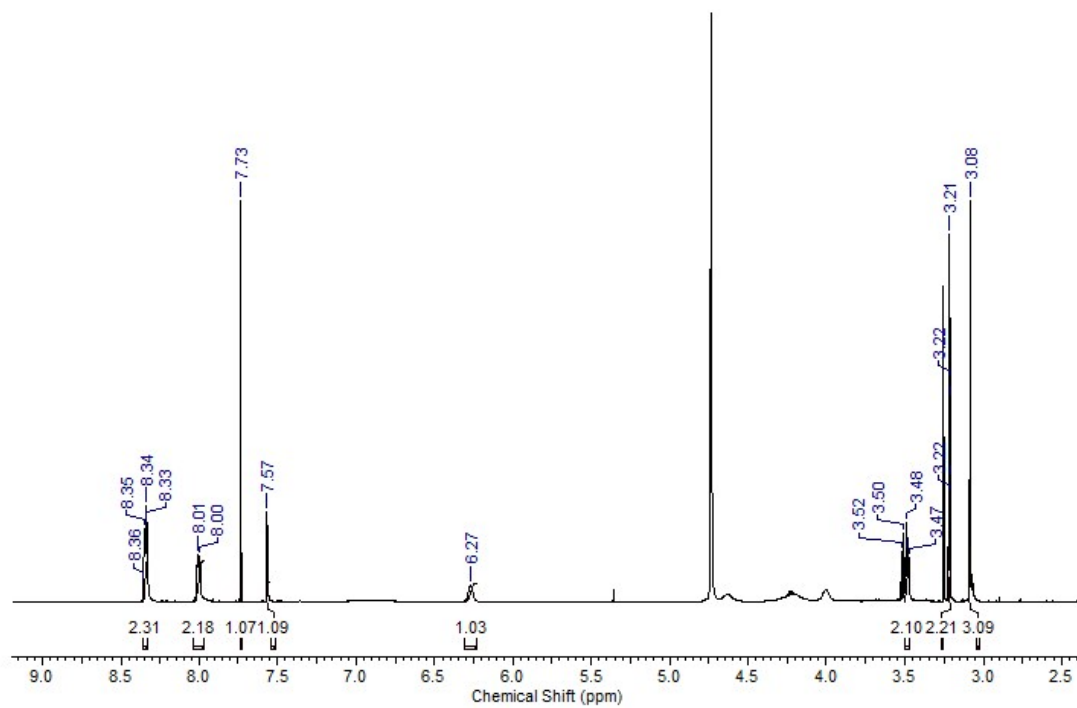

# <sup>1</sup>H-NMR spectra of compound **10**

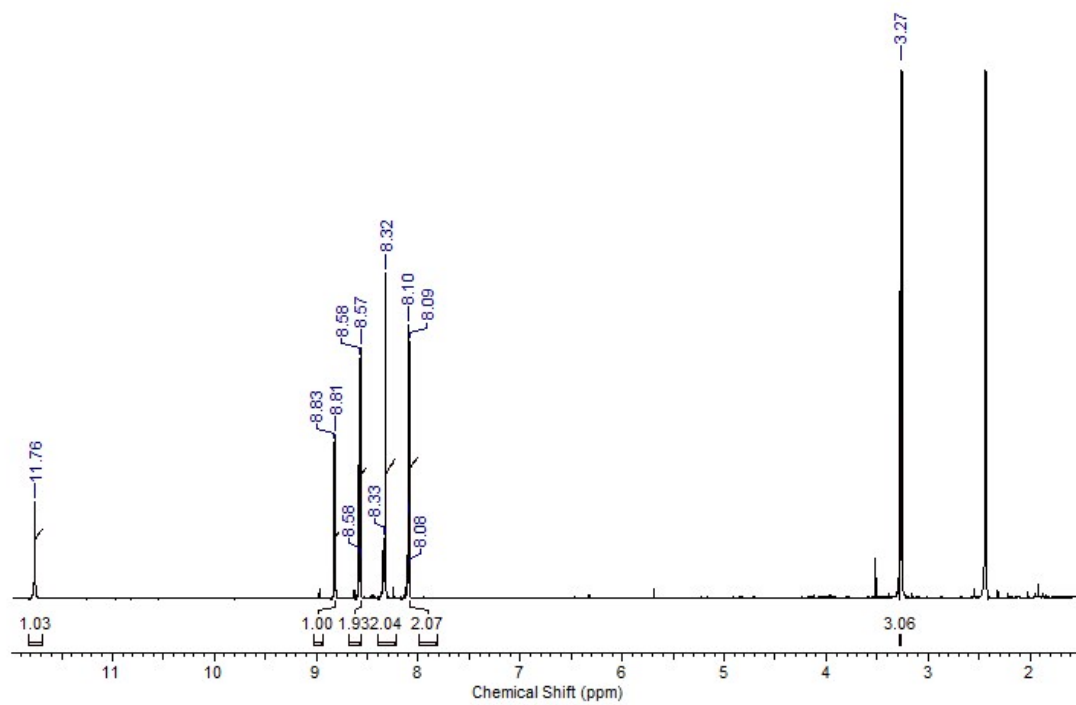

# <sup>13</sup>C NMR spectra of compound 5

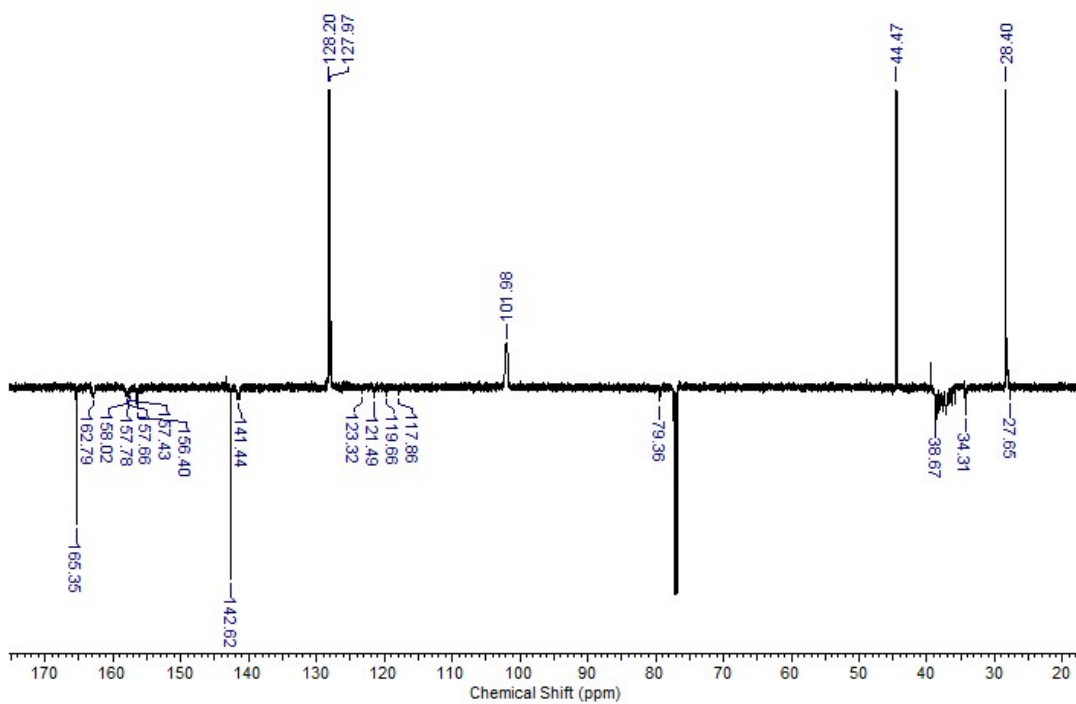



# <sup>13</sup>C NMR spectra of compound 6

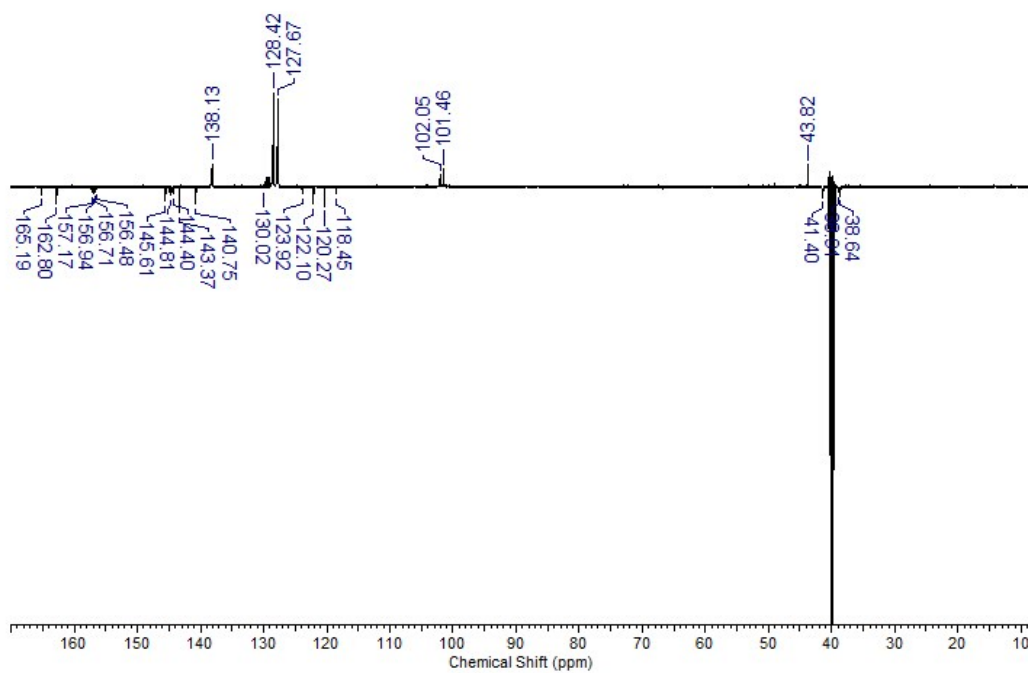

# <sup>13</sup>C NMR spectra of compound 7

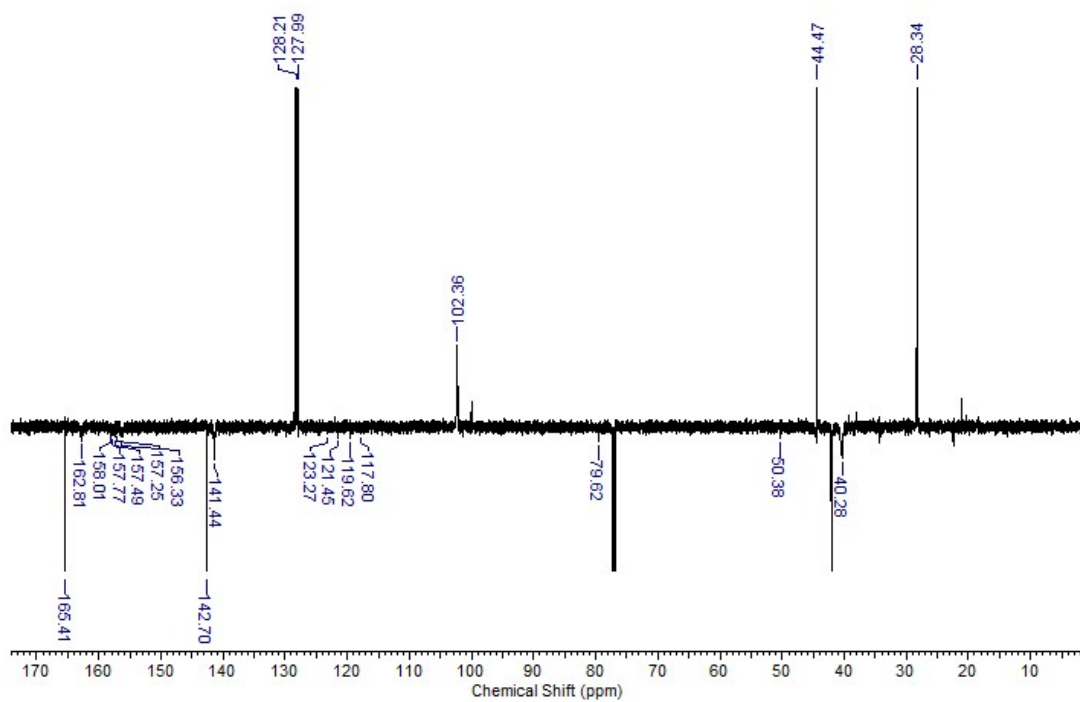

# <sup>13</sup>C NMR spectra of compound 8

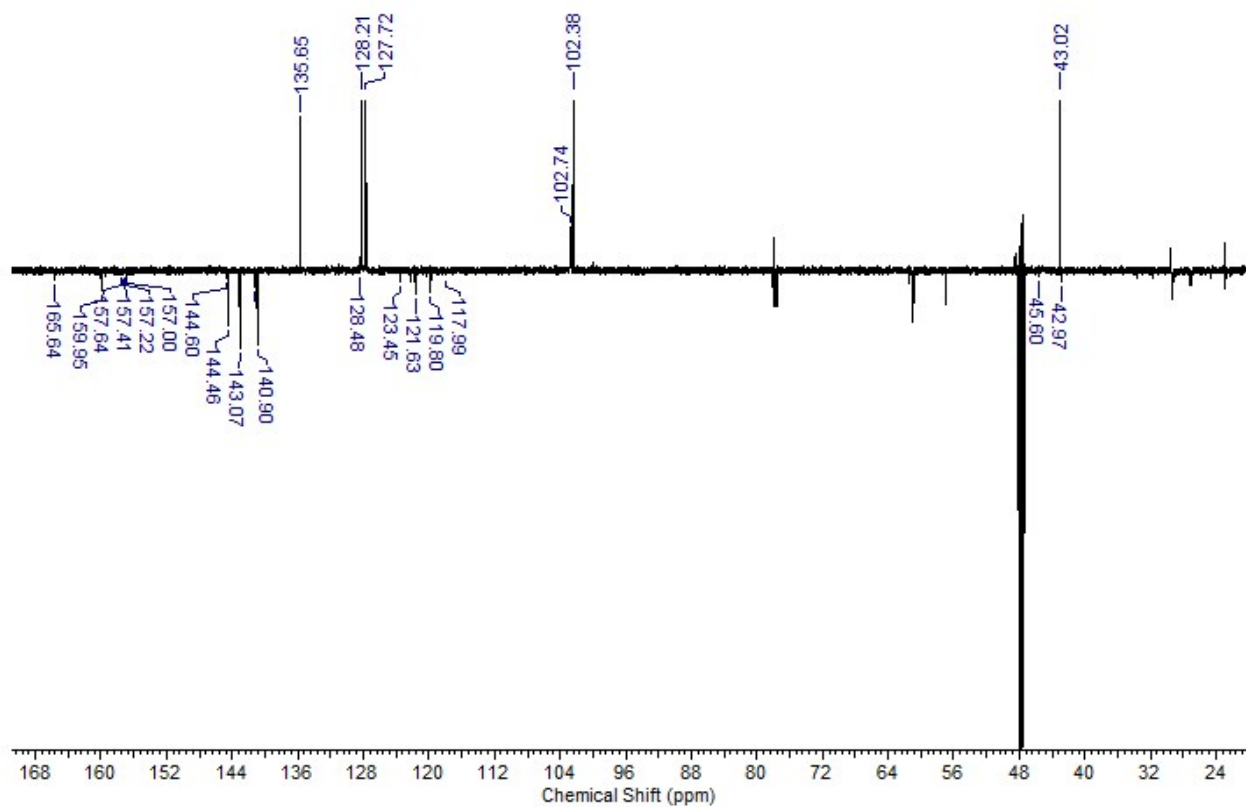

# <sup>13</sup>C NMR spectra of compound 10

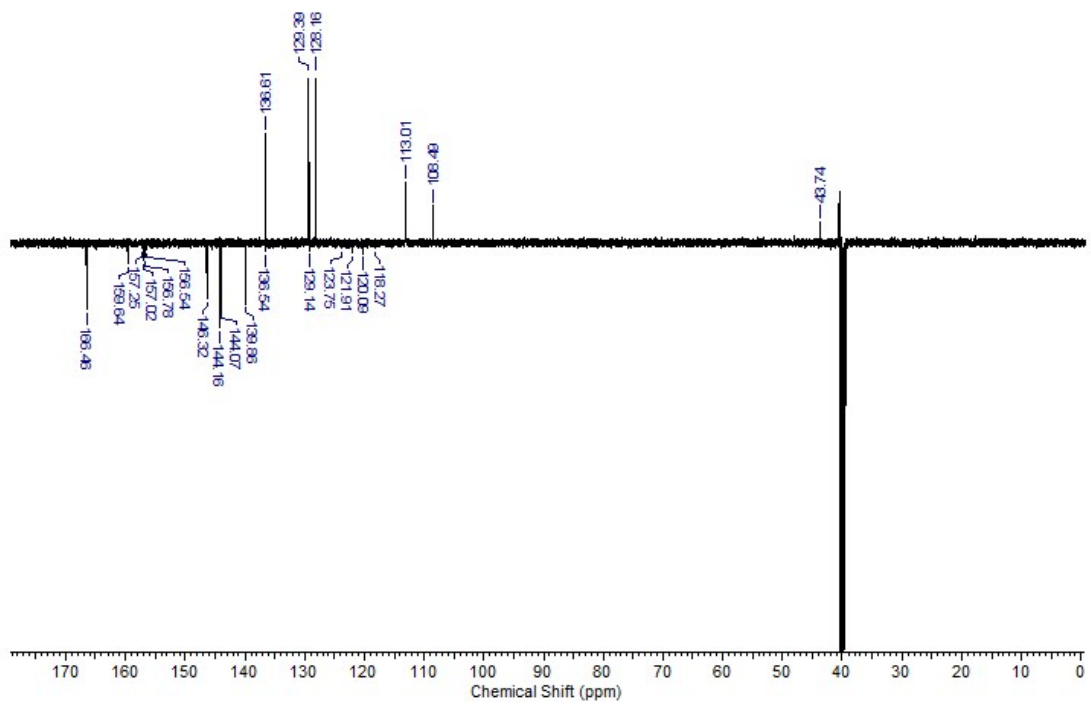

Supplement: c6ob00493h1.pdf [file c6ob00493h1.pdf]
